# Supplementary material for: Fish allergens of turbot (Scophthalmus maximus) parvalbumin triggers food allergy via inducing maturation of bone marrow derived dendritic cells and driving Th2 immune response
Source: Royal Society of Chemistry journal article supplement (doi:10.1039/d1fo04070g), 2022-01-01
Supplement: d1fo04070g1.pdf [file d1fo04070g1.pdf]

**Table S1** Clinical and serological characterization of fish-allergic patients.

| No.  | Sex <sup>a</sup> | Age (years) | Fish IgE levels (kUA/L) <sup>b</sup> | Symptoms <sup>c</sup> |
|------|------------------|-------------|--------------------------------------|-----------------------|
| HS1  | M                | 25          | 3.68                                 | C                     |
| HS2  | F                | 26          | 0.6                                  | U                     |
| HS3  | F                | 41          | 1.25                                 | Ba                    |
| HS4  | M                | 29          | 0.78                                 | Ac                    |
| HS5  | F                | 22          | 1.65                                 | U,Ac                  |
| HS6  | F                | 13          | 4.32                                 | Ad                    |
| HS7  | F                | 25          | 0.00                                 | -                     |
| HS8  | M                | 18          | 0.00                                 | -                     |
| HS9  | F                | 9           | 0.00                                 | -                     |
| HS10 | F                | 34          | 0.00                                 | -                     |

<sup>a</sup> F, female; M, male.

<sup>b</sup> A serum with specific IgE > 0.35 (kU/L) is defined as positive.

<sup>c</sup> C, cough; U, urticaria; Ba, bronchial asthma; Ac, asthma and cough; Ad, atopic dermatitis.

**Table S2** Information of reagents and antibodies.

| Antibody  | Fluorochrome                      | Dilution | Clone       | Company      | Reference No. |
|-----------|-----------------------------------|----------|-------------|--------------|---------------|
| MHCII     | FITC                              | 1/50     | M5/114.15.2 | Biogenesis   | 107605        |
| CD80      | PE                                | 1/20     | 16-10A1     | Biogenesis   | 104707        |
| CD83      | BV421                             | 1/20     | Michel-19   | BD           | 562932        |
| CD86      | PE-Cyanine 7                      | 1/20     | GL1         | eBioscience™ | 25-0862-82    |
| Live/Dead | Fixable Viability Dye eFluor™ 780 | —        | —           | eBioscience™ | 65-0865-14    |
